# Supplementary material for: Highly stable carbon-protected cobalt nanoparticles and graphite shells
Source: Royal Society of Chemistry journal article supplement (doi:10.1039/b414146f), 2004-11-17
Supplement: b414146f.pdf [file b414146f.pdf]

# Highly stable carbon-protected cobalt nanoparticles and graphite shells

An-Hui Lu, Wen-Cui Li, Nina Matoussevitch, Bernd Spliethoff, Helmut Bönemann and  
Ferdinand Schüth\*

## Supporting Materials

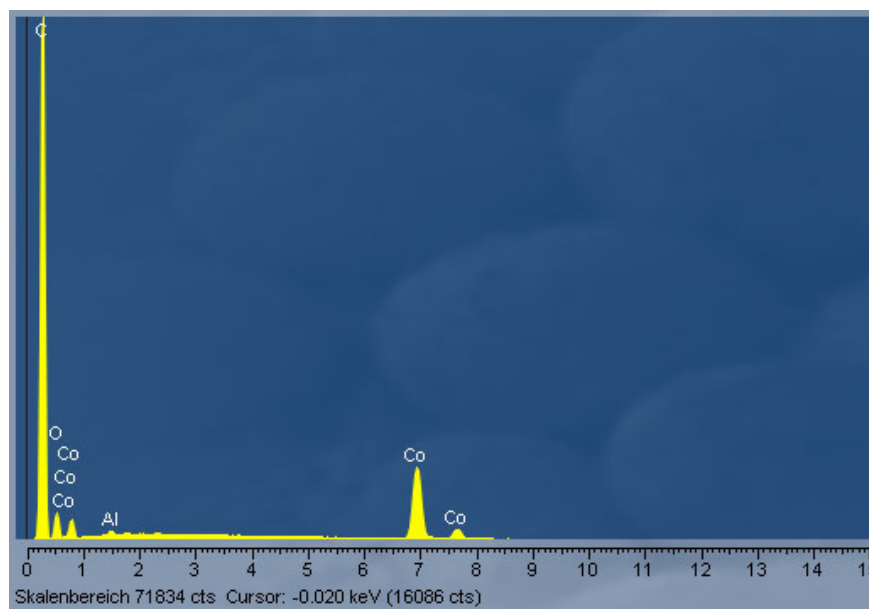

Fig. S1. EDX result of Co@C-1 after 1 month treatment in 53% HNO<sub>3</sub>. The weight ratio of C:  
O : Al : Co = 77.48 : 11.11 : 0.18 : 11.22.

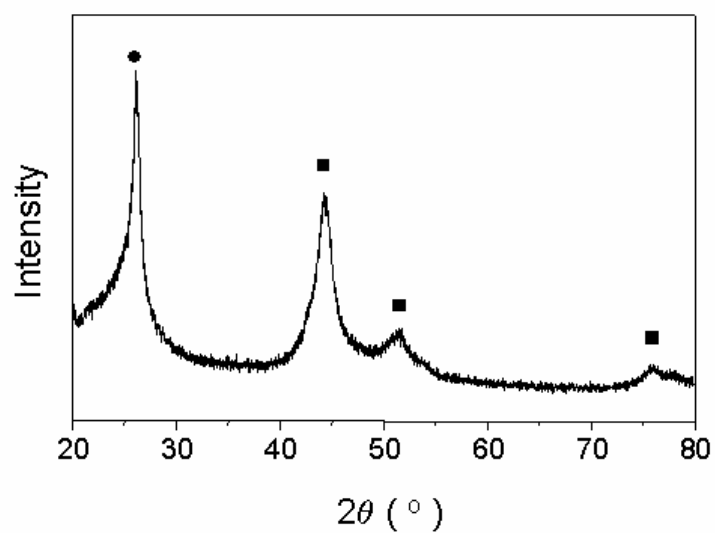

Fig. S2. XRD pattern of Co@C-1 after 53% HNO<sub>3</sub> treatment. In the XRD pattern: reflection (●) relating to the graphite; reflections (■) relating to Co [PDF 15–806]

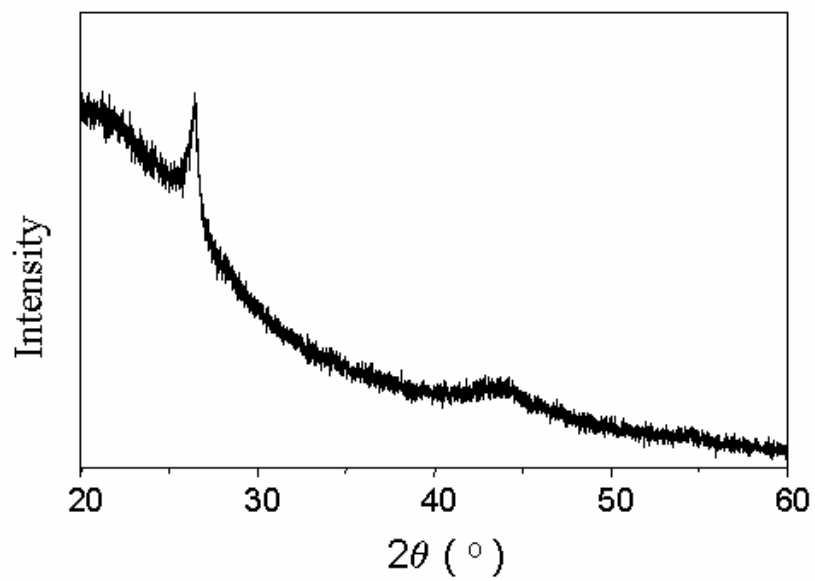

Fig. S3. Original XRD pattern of graphite shells (without background subtraction)
